# Supplementary material for: Wheelchair Tilt-in-Space and Recline Functions: Influence on Sitting Interface Pressure and Ischial Blood Flow in an Elderly Population
Source: Hindawi journal article supplement (doi:10.1155/2019/4027976), 2019-03-06
Supplement: f1 [file 4027976.f1.pdf]

## Supplementary Materials

Table S1: Mean value and standard deviation of the normalised mean sitting pressure ( $P_{\text{mean}}$ ) for all analysed tilt (T) and recline (R) combinations.

|      | 5°R           | 15°R          | 30°R          |
|------|---------------|---------------|---------------|
| 5°T  | 1.000 ± 0.000 | 0.943 ± 0.046 | 0.842 ± 0.057 |
| 15°T | 0.973 ± 0.040 |               | 0.780 ± 0.074 |
| 25°T | 0.928 ± 0.082 | 0.810 ± 0.060 | 0.703 ± 0.071 |
| 35°T | 0.861 ± 0.070 |               | 0.614 ± 0.072 |
| 45°T | 0.776 ± 0.069 | 0.672 ± 0.080 | 0.555 ± 0.063 |

Table S2: Mean value and standard deviation of the normalised ischial blood flow (BF) for all analysed tilt (T) and recline (R) combinations.

|      | 5°R           | 15°R          | 30°R          |
|------|---------------|---------------|---------------|
| 5°T  | 1.000 ± 0.000 | 1.021 ± 0.173 | 1.136 ± 0.411 |
| 15°T | 1.057 ± 0.096 |               | 1.365 ± 0.501 |
| 25°T | 1.140 ± 0.158 | 1.178 ± 0.206 | 1.239 ± 0.329 |
| 35°T | 1.210 ± 0.272 |               | 1.379 ± 0.451 |
| 45°T | 1.171 ± 0.260 | 1.296 ± 0.356 | 1.336 ± 0.418 |

Table S3: Mean value and standard deviation of the normalised amounts of haemoglobin (rHb) for all analysed tilt (T) and recline (R) combinations.

|      | 5°R           | 15°R          | 30°R          |
|------|---------------|---------------|---------------|
| 5°T  | 1.000 ± 0.000 | 0.998 ± 0.040 | 0.995 ± 0.078 |
| 15°T | 1.012 ± 0.052 |               | 1.009 ± 0.081 |
| 25°T | 1.015 ± 0.069 | 0.999 ± 0.085 | 1.002 ± 0.102 |
| 35°T | 0.979 ± 0.045 |               | 1.003 ± 0.109 |
| 45°T | 1.003 ± 0.044 | 0.997 ± 0.086 | 1.001 ± 0.100 |

Table S4: Mean value and standard deviation of the normalised blood flow velocity (BFV) for all analysed tilt (T) and recline (R) combinations.

|      | 5°R           | 15°R          | 30°R          |
|------|---------------|---------------|---------------|
| 5°T  | 1.000 ± 0.000 | 1.044 ± 0.132 | 0.978 ± 0.132 |
| 15°T | 1.007 ± 0.050 |               | 1.003 ± 0.143 |
| 25°T | 0.985 ± 0.098 | 0.974 ± 0.130 | 0.975 ± 0.129 |
| 35°T | 0.983 ± 0.143 |               | 0.982 ± 0.148 |
| 45°T | 0.987 ± 0.135 | 1.010 ± 0.117 | 1.022 ± 0.105 |
